# Supplementary material for: Electrochemical, spectroscopic, magnetic and structural studies of complexes bearing ferrocenyl ligands of N-(3-hydroxypicolinoyl)picolinamide
Source: Royal Society of Chemistry journal article supplement (doi:10.1039/c2nj40177k), 2012-01-01
Supplement: c2nj40177k.pdf [file c2nj40177k.pdf]

*Supporting Information:*

# Electrochemical, Spectroscopic, Magnetic and Structural Studies of Complexes Bearing Ferrocenyl Ligands of *N*-(3-Hydroxypicolinoyl)picolinamide

Gilles Gasser,<sup>a,†,\*</sup> Cristina Mari,<sup>b</sup> Michelle Burkart,<sup>b</sup> Stephen J. Green,<sup>c,\*</sup> Joan Ribas,<sup>d</sup> Helen Stoeckli-Evans<sup>a,‡,\*</sup> and James H.R. Tucker<sup>e,\*</sup>

<sup>a</sup>Université de Neuchâtel, Institut de Chimie, Av. de Bellevaux 51, Case Postale 2, CH-2007 Neuchâtel, Switzerland.

<sup>b</sup>Institute of Inorganic Chemistry, University of Zurich, Winterthurerstrasse 190, CH-8057 Zurich, Switzerland.

<sup>c</sup>School of Physics, University of Exeter, Stocker Road, Exeter, EX4 4QL, UK; Fax: + 44 121 414 4403; Email address: [S.J.Green@exeter.ac.uk](mailto:S.J.Green@exeter.ac.uk).

<sup>d</sup>Departament de Química Inorgànica, Universitat de Barcelona, Martí i Franquès, 08028 Barcelona, Spain.

<sup>e</sup>University of Birmingham, Edgbaston, Birmingham, B15 2TT, UK; Fax: + 44 121 414 4403; E-mail address: [j.tucker@bham.ac.uk](mailto:j.tucker@bham.ac.uk); WWW: <http://www.chem.bham.ac.uk/staff/Tucker.htm>.

[†] Please note the new address: Institute of Inorganic Chemistry, University of Zurich, Winterthurerstrasse 190, CH-8057 Zurich, Switzerland. Fax: +41 44 635 68 03. E-mail address: [gilles.gasser@aci.uzh.ch](mailto:gilles.gasser@aci.uzh.ch). WWW: [www.gassergroup.com](http://www.gassergroup.com).

[‡] Please note the new address: Institute of Physics, University of Neuchâtel, rue Emile-Argand 11, CH-2009 Neuchâtel, Switzerland. Fax: +41 32 718 25 11. E-mail address: [helen.stoeckli-evans@unine.ch](mailto:helen.stoeckli-evans@unine.ch). WWW: [www2.unine.ch/helen.stoeckli-evans](http://www2.unine.ch/helen.stoeckli-evans).

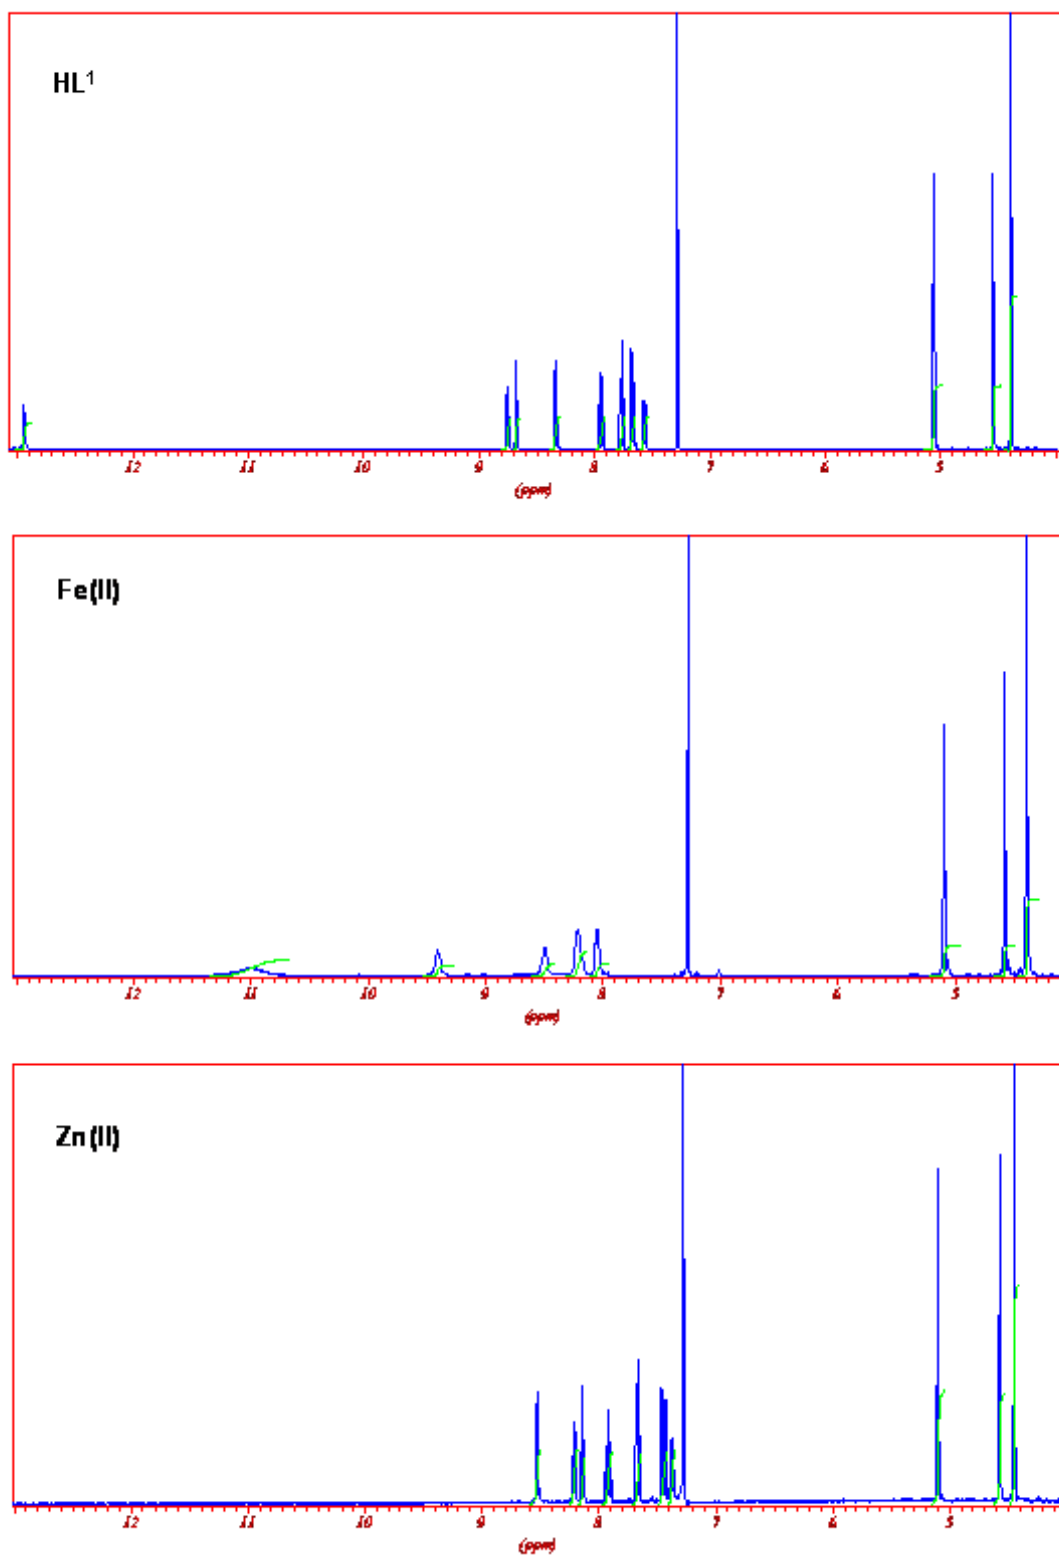

**Figure S1.** Comparison between <sup>1</sup>H-NMR spectra of ligand **HL<sup>1</sup>** and its complexes of Fe(II) and Zn(II) (stoichiometry 2:1 Ligand:Metal) in CDCl<sub>3</sub>.

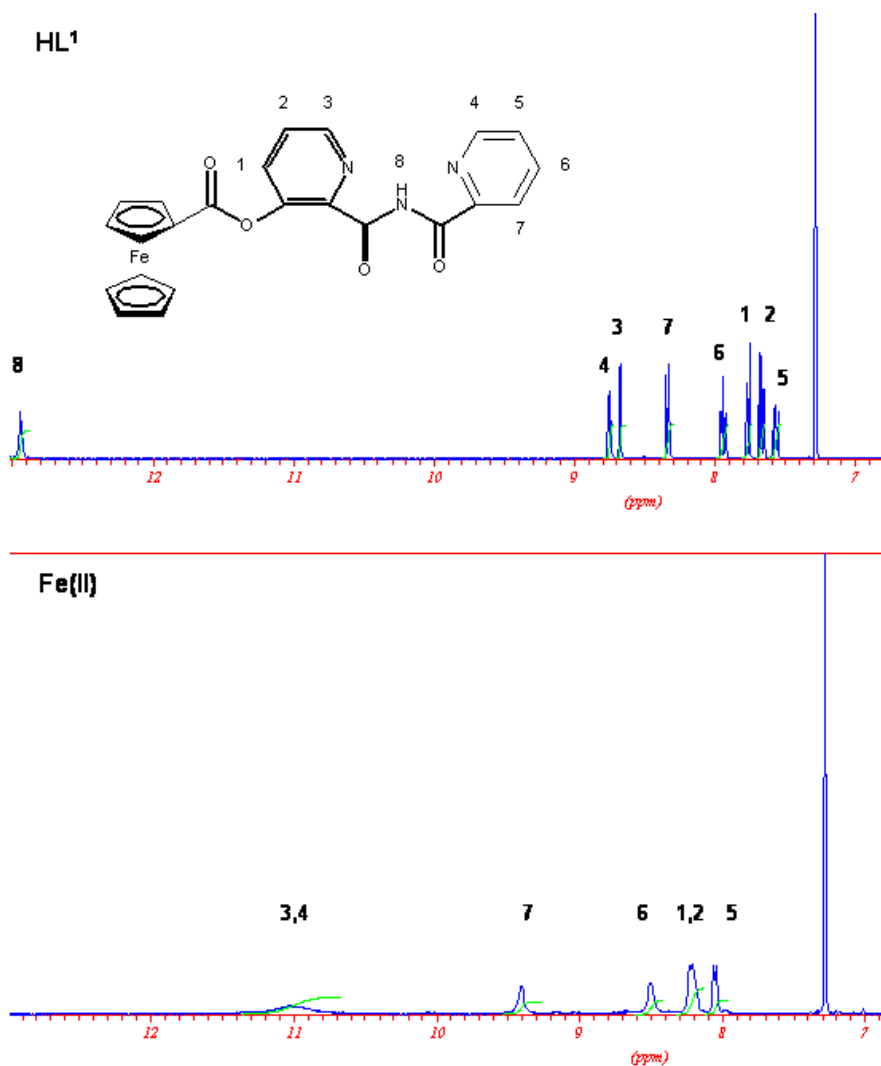

**Figure S2.** Comparison between <sup>1</sup>H-NMR spectra of ligand **HL<sup>1</sup>** and its complex of Fe(II) between  $\delta = 7$  and 13 ppm (stoichiometry 2:1 Ligand: Metal) in CDCl<sub>3</sub>.

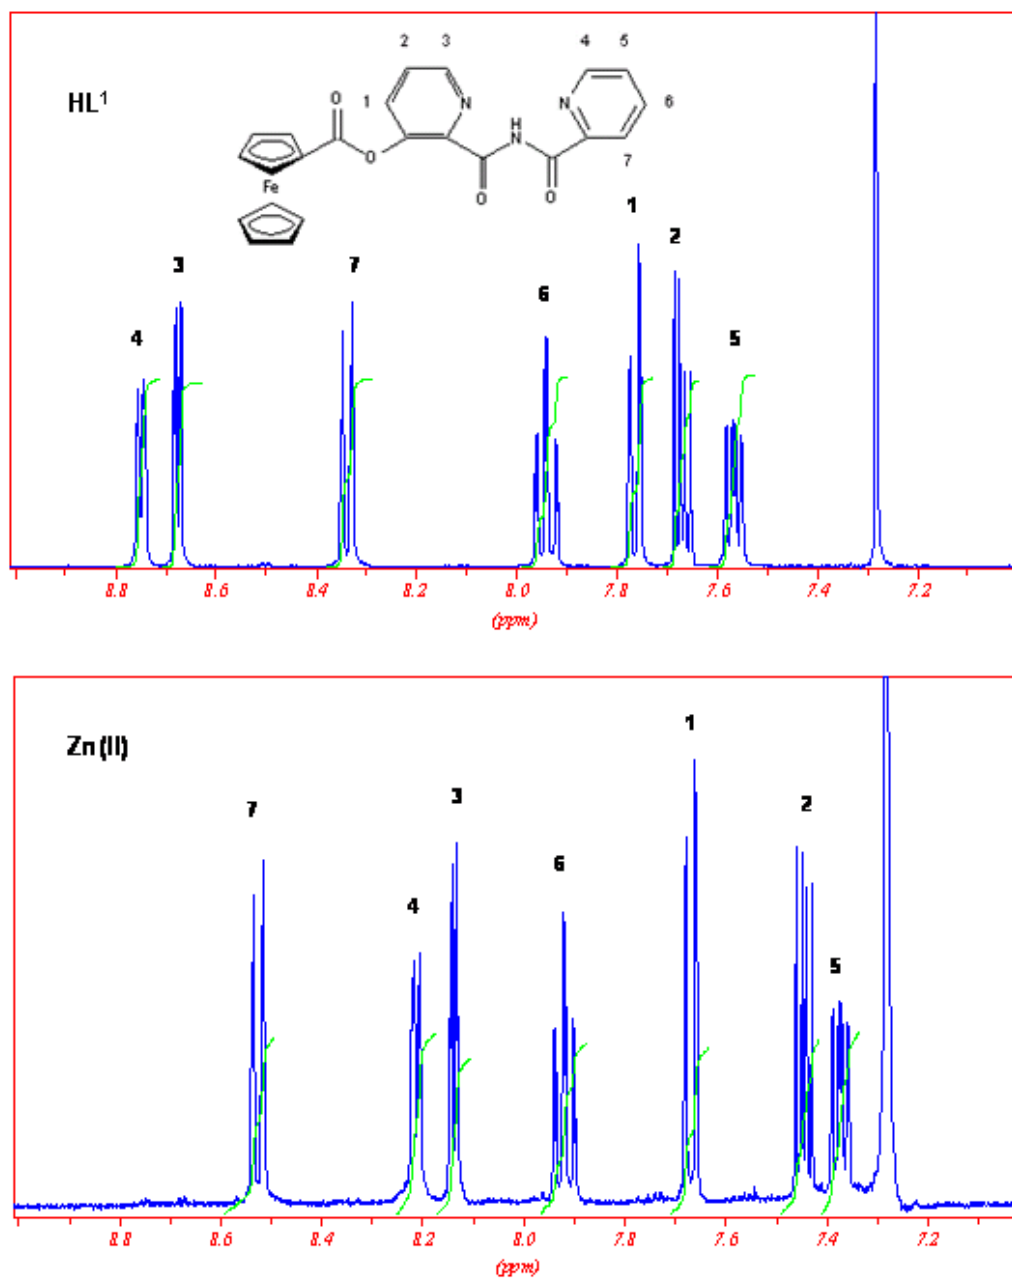

**Figure S3.** Comparison between <sup>1</sup>H-NMR spectra of ligand **HL**<sup>1</sup> and its complex of Zn(II) between  $\delta = 7$  and 9 ppm (stoichiometry 2:1 Ligand:Metal) in CDCl<sub>3</sub>.

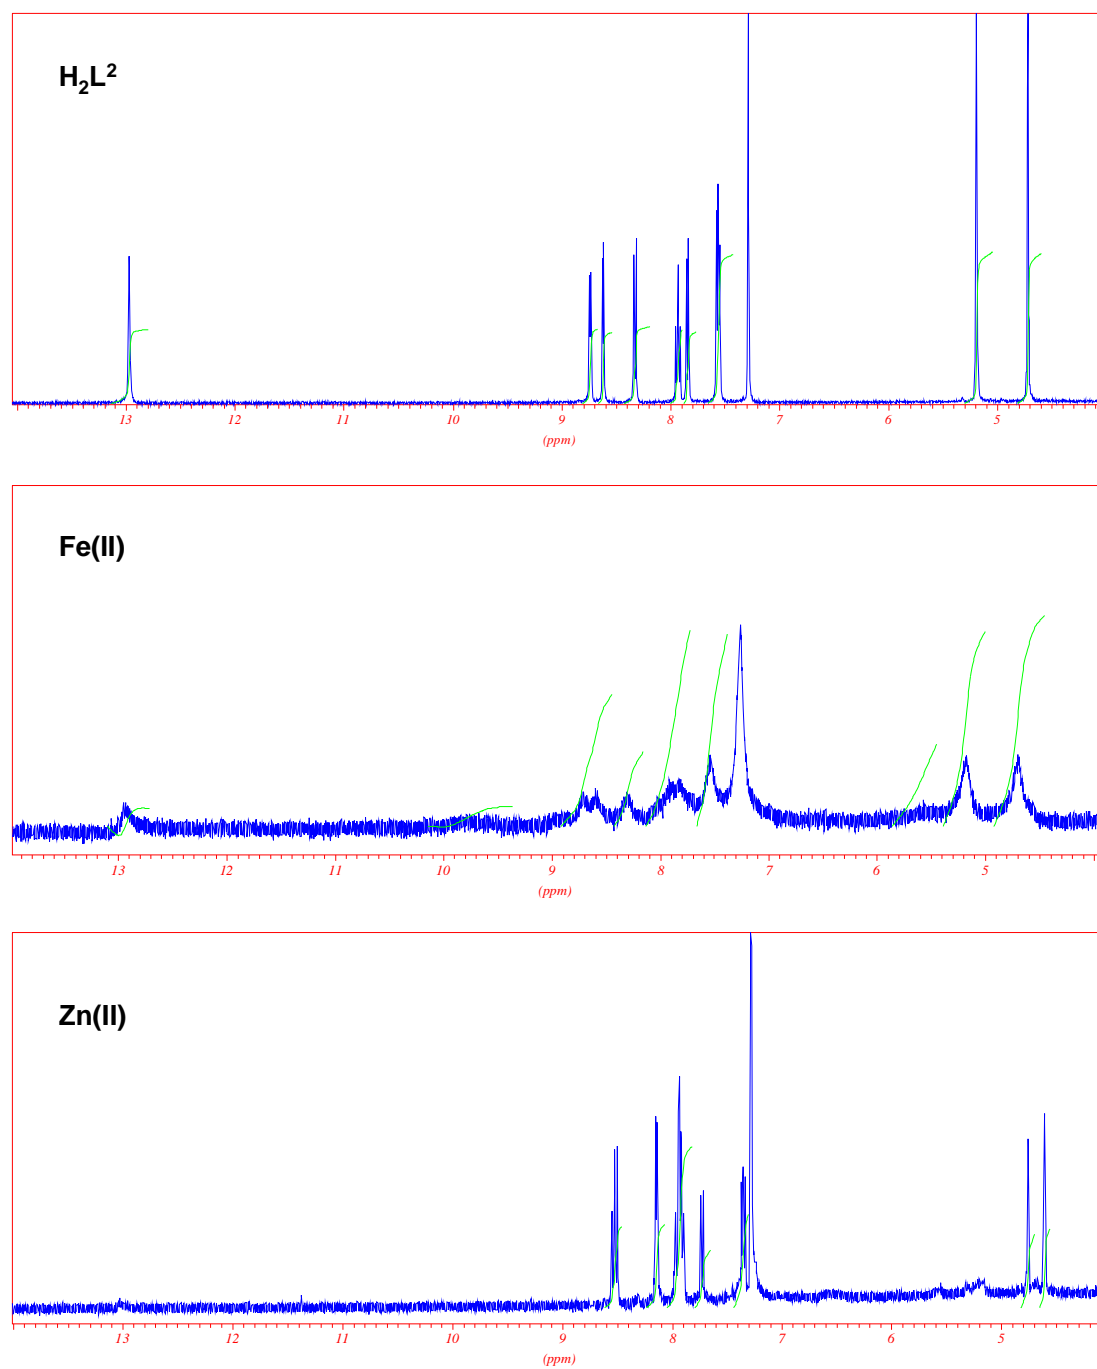

**Figure S4.** Comparison between <sup>1</sup>H-NMR spectra of ligand **H<sub>2</sub>L<sup>2</sup>** and its complexes of Fe(II) and Zn(II) (stoichiometry 1:1 Ligand: Metal) in CDCl<sub>3</sub>.

**Table S1.** Hydrogen-bond geometry (Å, °) for **HL**<sup>1</sup>

| <i>D</i> —H··· <i>A</i>    | <i>D</i> —H | H··· <i>A</i> | <i>D</i> ··· <i>A</i> | <i>D</i> —H··· <i>A</i> |
|----------------------------|-------------|---------------|-----------------------|-------------------------|
| N2—H2N···N1                | 0.89 (4)    | 2.15 (4)      | 2.611 (4)             | 112 (3)                 |
| N2—H2N···N3                | 0.89 (4)    | 2.18 (3)      | 2.647 (4)             | 112 (3)                 |
| C9—H9···O2 <sup>i</sup>    | 0.95        | 2.58          | 3.448 (4)             | 152                     |
| C14—H14···O3 <sup>ii</sup> | 0.95        | 2.53          | 3.139 (4)             | 122                     |
| C15—H15···O3 <sup>ii</sup> | 0.95        | 2.57          | 3.169 (4)             | 121                     |
| C15—H15···O4 <sup>ii</sup> | 0.95        | 2.33          | 3.247 (4)             | 161                     |

Symmetry codes: (i)  $-x+2, -y, -z$ ; (ii)  $x, y+1, z$ .

**Table S2.** Hydrogen-bond geometry (Å, °) for **H<sub>2</sub>L<sup>2</sup>·2(CHCl<sub>3</sub>)**,

| <i>D</i> —H··· <i>A</i>       | <i>D</i> —H | H··· <i>A</i> | <i>D</i> ··· <i>A</i> | <i>D</i> —H··· <i>A</i> |
|-------------------------------|-------------|---------------|-----------------------|-------------------------|
| N2—H2N···N1                   | 0.85 (4)    | 2.17 (5)      | 2.611 (4)             | 112 (3)                 |
| N2—H2N···N3                   | 0.85 (4)    | 2.18 (4)      | 2.623 (4)             | 113 (4)                 |
| N5—H5N···N4                   | 0.83 (4)    | 2.17 (5)      | 2.599 (4)             | 112 (3)                 |
| N5—H5N···N6                   | 0.83 (4)    | 2.21 (4)      | 2.627 (4)             | 111 (4)                 |
| C3—H3A···Cl5 <sup>i</sup>     | 0.95        | 2.83          | 3.579 (4)             | 137                     |
| C8—H8A···O8 <sup>ii</sup>     | 0.95        | 2.37          | 3.225 (4)             | 149                     |
| C17—H17A···Cl5 <sup>iii</sup> | 0.95        | 2.79          | 3.542 (4)             | 136                     |
| C18—H18A···Cl1 <sup>ii</sup>  | 0.95        | 2.82          | 3.749 (4)             | 166                     |
| C26—H26A···O4 <sup>i</sup>    | 0.95        | 2.58          | 3.383 (4)             | 143                     |
| C35—H35A···Cl3 <sup>iv</sup>  | 0.95        | 2.82          | 3.701 (4)             | 154                     |
| C36—H36A···Cl6 <sup>iv</sup>  | 0.95        | 2.76          | 3.706 (4)             | 176                     |
| C37—H37A···O7 <sup>ii</sup>   | 1.00        | 2.57          | 3.314 (5)             | 131                     |
| C37—H37A···O8 <sup>ii</sup>   | 1.00        | 2.37          | 3.186 (5)             | 138                     |
| C38—H38A···O3 <sup>v</sup>    | 1.00        | 2.35          | 3.162 (4)             | 138                     |
| C38—H38A···O4 <sup>v</sup>    | 1.00        | 2.40          | 3.150 (5)             | 131                     |

Symmetry codes: (i)  $-x, y+1/2, -z+1/2$ ; (ii)  $-x+1, y-1/2, -z+1/2$ ; (iii)  $-x, y-1/2, -z+1/2$ ; (iv)  $x, y+1, z$ ; (v)  $x, -y+1/2, z-1/2$ .

**Table S3.** Changes of  $\Delta\lambda_{\max}$  and  $\epsilon$  upon complexation of ligand **HL**<sup>1</sup> with metallic cations.

|                                                                                             | <b>HL<sup>1</sup></b> |                                                                               | <b>H<sub>2</sub>L<sup>2</sup></b> |
|---------------------------------------------------------------------------------------------|-----------------------|-------------------------------------------------------------------------------|-----------------------------------|
| $\lambda_{\max} / \text{nm}$                                                                | <b>463</b>            | $\lambda_{\max} / \text{nm}$                                                  | 466                               |
| $\varepsilon / \text{dm}^3 \cdot \text{mol}^{-1}$                                           | <b>369</b>            | $\varepsilon / \text{dm}^3 \cdot \text{mol}^{-1}$                             | 420                               |
| Shift in $\lambda_{\max}$ of <b>Fe(L<sup>1</sup>)<sub>2</sub></b> / nm                      | <b>+25</b>            | Shift of $\lambda_{\max}$ of <b>FeL<sup>2</sup></b> / nm                      | +30                               |
| $\varepsilon$ of <b>Fe(L<sup>1</sup>)<sub>2</sub></b> / $\text{dm}^3 \cdot \text{mol}^{-1}$ | <b>9322</b>           | $\varepsilon$ of <b>FeL<sup>2</sup></b> / $\text{dm}^3 \cdot \text{mol}^{-1}$ | 3512                              |
| Shift in $\lambda_{\max}$ of <b>Ni(L<sup>1</sup>)<sub>2</sub></b> / nm                      | <b>-17</b>            | Shift of $\lambda_{\max}$ of <b>NiL<sup>2</sup></b> / nm                      | +18                               |
| $\varepsilon$ of <b>Ni(L<sup>1</sup>)<sub>2</sub></b> / $\text{dm}^3 \cdot \text{mol}^{-1}$ | <b>1437</b>           | $\varepsilon$ of <b>NiL<sup>2</sup></b> / $\text{dm}^3 \cdot \text{mol}^{-1}$ | 1120                              |
| Shift in $\lambda_{\max}$ of <b>Cu(L<sup>1</sup>)<sub>2</sub></b> / nm                      | <b>+11</b>            | Shift of $\lambda_{\max}$ of <b>CuL<sup>2</sup></b> / nm                      | +16                               |
| $\varepsilon$ of <b>Cu(L<sup>1</sup>)<sub>2</sub></b> / $\text{dm}^3 \cdot \text{mol}^{-1}$ | <b>2607</b>           | $\varepsilon$ of <b>CuL<sup>2</sup></b> / $\text{dm}^3 \cdot \text{mol}^{-1}$ | 1239                              |
| Shift in $\lambda_{\max}$ of <b>Zn(L<sup>1</sup>)<sub>2</sub></b> / nm                      | <b>+18</b>            | Shift of $\lambda_{\max}$ of <b>ZnL<sup>2</sup></b> / nm                      | -15                               |
| $\varepsilon$ of <b>Zn(L<sup>1</sup>)<sub>2</sub></b> / $\text{dm}^3 \cdot \text{mol}^{-1}$ | <b>1448</b>           | $\varepsilon$ of <b>ZnL<sup>2</sup></b> / $\text{dm}^3 \cdot \text{mol}^{-1}$ | 1400                              |

**Table S4.** Change in formal potential,<sup>a</sup>  $\Delta E^{\circ\prime} = E^{\circ\prime}_{\text{com}} - E^{\circ\prime}_{\text{ligand}}$ , for the ferrocene-centered redox couple of selected ligand between that of the complexes and that of **HL<sup>1</sup>** or **H<sub>2</sub>L<sup>2</sup>** in a mixture of CH<sub>2</sub>Cl<sub>2</sub>:acetonitrile 1:1 v/v at ambient temperature.<sup>a</sup>

| <b>Complexes</b>                            | $\Delta E^{\circ'}$ / mV vs $\text{Fc}^{0/+}_{\text{HL1}}$ | <b>Complexes</b>                 | $\Delta E^{\circ'}$ / mV vs $\text{Fc}^{0/+}_{\text{H2L2}}$ |
|---------------------------------------------|------------------------------------------------------------|----------------------------------|-------------------------------------------------------------|
| <b><math>\text{Fe}(\text{L}^1)_2</math></b> | +29.0                                                      | <b><math>\text{NiL}^2</math></b> | +22.0*                                                      |
| <b><math>\text{Ni}(\text{L}^1)_2</math></b> | -12.5                                                      | <b><math>\text{FeL}^2</math></b> | +8.0*                                                       |
| <b><math>\text{Cu}(\text{L}^1)_2</math></b> | +13.0                                                      | <b><math>\text{CuL}^2</math></b> | +24.0*                                                      |
| <b><math>\text{Zn}(\text{L}^1)_2</math></b> | -6.5                                                       | <b><math>\text{ZnL}^2</math></b> | +42.0*                                                      |

\* obtained by DPV because of the very low complex solubility

<sup>a</sup> Formal potentials,  $E^{\circ'}$ , at ambient temperature, referenced to  $E^{\circ'}(\text{Fc}^{0/+})$  as internal reference, were determined as the midpoint between the anodic and cathodic peak potentials  $(E_{\text{pa}} + E_{\text{pc}})/2$ ; the margin of error was  $\pm 5$  mV.



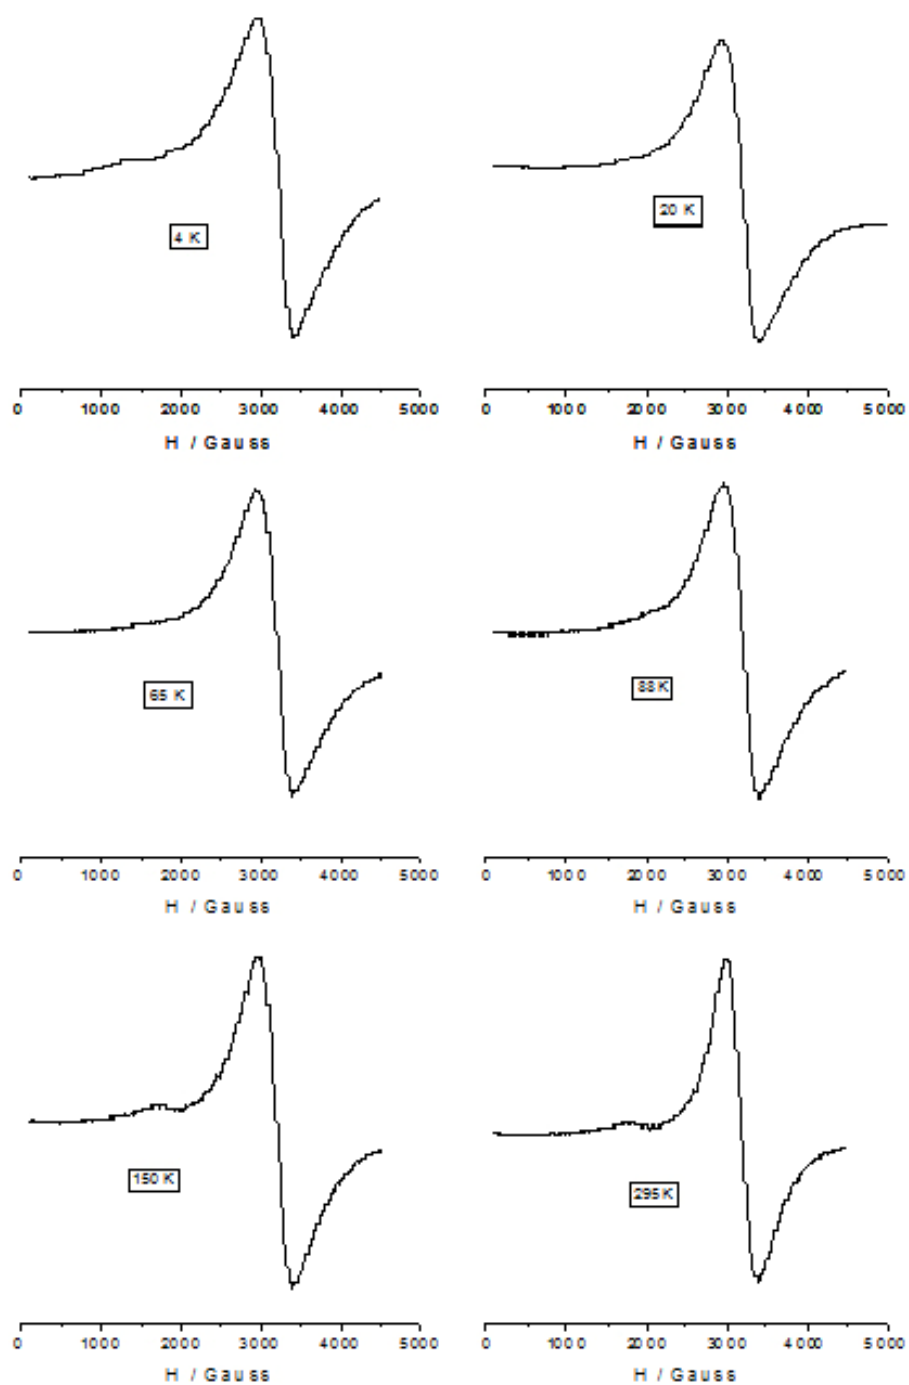

**Figure S5.** EPR spectra of complex  $[\text{Cu}_2\text{I}_2\text{L}^2]_n$  at different temperatures.
